# Supplementary material for: Habitat loss weakens the positive relationship between grassland plant richness and above-ground biomass
Source: eLife. 2024 Mar 18;12:RP91193. doi: 10.7554/eLife.91193 (PMC10948147; doi:10.7554/eLife.91193)
Supplement: Source data 1. [file elife-91193-data1.xlsx]

## Sheet: Sheet1
Site	Longitude	latitude	Habitat loss level	Fragmentation per se level	Habitat amount	Habitat loss	Fragmentation per se	Soil water content	land surface temperature	Grassland specialist richness	Weed richness	Plant richness	Percentage of grassland specialists	Above-ground biomass
site1	111.815	41.4679	low	low	30.2384	69.7616	-0.033095	5.07114	28.84	7	5	12	0.583333	115.68
site2	111.802	41.4777	low	low	23.0866	76.9134	-0.032313	4.8557	28.695	7.66667	4	11.6667	0.657143	104.24
site3	111.646	41.6746	low	low	20.9536	79.0464	-0.0351148	13.3405	30.175	6.66667	3	9.66667	0.689655	107.44
site4	111.765	41.4609	low	low	31.995	68.005	-0.038647	10.2843	27.51	8	4.66667	12.6667	0.631579	132.86
site5	111.658	41.4154	low	low	29.862	70.138	-0.0422394	14.897	27.73	5.66667	1	6.66667	0.85	110.25
site6	111.568	41.3061	low	low	31.744	68.256	-0.0348127	7.40861	26.595	8.66667	3.66667	12.3333	0.702703	144.79
site7	111.493	41.3224	low	low	30.2384	69.7616	-0.0363273	7.20966	27.025	7	2.66667	9.66667	0.724138	78.1133
site8	111.696	41.3706	low	low	29.611	70.389	-0.0296913	11.1091	27.335	4.66667	3	7.66667	0.608696	128.37
site9	111.417	41.4146	low	moderate	14.8055	85.1945	0.0144646	1.58014	28.86	5.66667	7.33333	13	0.435897	93.4467
site10	111.527	41.6738	low	moderate	4.51694	95.4831	-0.00357569	14.5641	28.75	1.66667	5.33333	7	0.238095	77.2233
site11	111.53	41.716	low	moderate	3.01129	96.9887	0.0123176	6.94632	27.6	13.6667	6.66667	20.3333	0.672131	161.957
site12	111.595	41.657	low	moderate	5.26976	94.7302	-0.0175674	3.92682	30.72	5.33333	4	9.33333	0.571429	87.27
site13	111.614	41.691	low	moderate	9.03388	90.9661	0.0185687	5.64406	26.43	7.66667	3	10.6667	0.71875	114.963
site14	111.411	41.3917	low	moderate	23.8394	76.1606	0.0309581	6.5069	28.195	9	3.33333	12.3333	0.72973	113.813
site15	111.657	41.3478	low	moderate	22.3338	77.6662	0.0272164	4.34668	25.76	12	2.66667	14.6667	0.818182	162.94
site16	111.571	41.3548	low	moderate	28.6073	71.3927	0.0151008	4.0788	27.63	9.66667	2.66667	12.3333	0.783784	135.84
site17	111.551	41.3478	low	moderate	30.1129	69.8871	0.0294114	3.96014	27.78	9.66667	0.666667	10.3333	0.935484	113.263
site18	111.509	41.3497	low	moderate	24.2158	75.7842	0.000300061	6.5914	26.04	5.66667	5	10.6667	0.53125	105.18
site19	111.804	41.576	low	moderate	23.7139	76.2861	0.0259495	2.08981	29.205	8.33333	1.33333	9.66667	0.862069	76.7933
site20	111.488	41.35	low	moderate	14.8055	85.1945	0.0134613	3.38919	26.025	6.66667	3	9.66667	0.689655	143.56
site21	111.84	41.5761	low	moderate	19.9498	80.0502	0.0100372	1.66881	29.155	6.33333	3	9.33333	0.678571	91.31
site22	111.834	41.4326	low	moderate	19.8243	80.1757	0.00284466	5.28929	27.525	10	6	16	0.625	127.96
site23	111.85	41.4187	low	moderate	22.5847	77.4153	0.0102306	4.70726	27.265	6.33333	3	9.33333	0.678571	110.543
site24	111.649	41.5189	low	moderate	14.3036	85.6964	0.000335683	2.85604	28.455	4	6.33333	10.3333	0.387097	128.407
site25	111.665	41.5115	low	moderate	5.39523	94.6048	0.00656781	3.50877	27.835	5	6.33333	11.3333	0.441176	149.053
site26	111.443	41.4226	low	moderate	30.1129	69.8871	0.0256701	2.39618	28.55	6.66667	4	10.6667	0.625	91.7567
site27	111.526	41.4412	low	moderate	7.40276	92.5972	0.0225551	1.893	26.39	3	9.66667	12.6667	0.236842	88.2333
site28	111.663	41.6267	low	high	13.0489	86.9511	0.0566888	1.59509	28.315	8.66667	1.66667	10.3333	0.83871	52.62
site29	111.856	41.4381	low	high	19.6989	80.3011	0.0423192	3.85183	27.07	9.66667	4	13.6667	0.707317	111.09
site30	111.644	41.4976	low	high	28.9837	71.0163	0.0631339	1.8528	28.62	10	3.33333	13.3333	0.75	124.807
site31	111.505	41.4089	low	high	12.4216	87.5784	0.0753197	1.30631	26.395	8	5	13	0.615385	66.84
site32	111.522	41.6571	low	high	24.7177	75.2823	0.0882083	6.27336	28.45	7.33333	7.33333	14.6667	0.5	63.11
site33	111.565	41.7064	low	high	24.4668	75.5332	0.0894134	7.07252	29.78	12	5	17	0.705882	111.39
site34	111.533	41.6427	low	high	25.4705	74.5295	0.0806065	6.74644	29.37	11	8.33333	19.3333	0.568966	203.027
site35	111.573	41.6917	low	high	28.2309	71.7691	0.0509616	6.57277	29.935	13.6667	4.33333	18	0.759259	149.46
site36	111.667	41.5612	low	high	24.2158	75.7842	0.0375324	1.6964	30.035	9.66667	4	13.6667	0.707317	74.8233
site37	111.608	41.42	low	high	25.0941	74.9059	0.0663048	3.48866	28.855	6	5.33333	11.3333	0.529412	108.583
site38	111.503	41.6315	low	high	7.77917	92.2208	0.0451479	2.51121	29.84	8.66667	4.66667	13.3333	0.65	115.387
site39	111.557	41.5994	low	high	29.7365	70.2635	0.0532214	2.56641	30.1	9.33333	3.66667	13	0.717949	141.697
site40	111.638	41.5517	low	high	26.9762	73.0238	0.073518	7.26443	28.905	4.66667	7	11.6667	0.4	156.303
site41	111.63	41.566	low	high	25.7215	74.2785	0.0871427	5.0011	28.525	8.33333	2.66667	11	0.757576	130.1
site42	111.567	41.5661	low	high	12.798	87.202	0.0674908	3.69217	28.67	9.33333	1.66667	11	0.848485	111.75
site43	111.585	41.529	low	high	32.2459	67.7541	0.0638664	1.00137	29.425	4.33333	5	9.33333	0.464286	96.5067
site44	111.613	41.5313	moderate	low	56.3363	43.6637	-0.0481336	3.4059	29.105	7.66667	0.666667	8.33333	0.92	102.77
site45	111.858	41.5581	moderate	low	67.5031	32.4969	-0.048179	8.56439	28.7	2.33333	5.33333	7.66667	0.304348	82.0333
site46	111.708	41.4672	moderate	low	68.1305	31.8695	-0.041234	4.01208	26.55	12	5.66667	17.6667	0.679245	197.633
site47	111.605	41.4881	moderate	low	63.2371	36.7629	-0.0409035	1.51712	28.675	9.66667	4	13.6667	0.707317	152.877
site48	111.576	41.4953	moderate	low	60.2258	39.7742	-0.0342935	3.53618	28.785	12.3333	3.33333	15.6667	0.787234	112.12
site49	111.578	41.4723	moderate	low	65.2447	34.7553	-0.0398711	4.60575	30.045	13.3333	4.33333	17.6667	0.754717	174.037
site50	111.671	41.6563	moderate	low	69.1343	30.8657	-0.0408864	1.6297	30.71	9.33333	4.33333	13.6667	0.682927	135.463
site51	111.772	41.4152	moderate	low	59.8494	40.1506	-0.0347164	3.33063	27.68	9.33333	5.33333	14.6667	0.636364	132.4
site52	111.705	41.4319	moderate	low	52.6976	47.3024	-0.0309182	1.92868	29.85	5.33333	8	13.3333	0.4	61.9067
site53	111.853	41.5295	moderate	low	66.8758	33.1242	-0.0374945	1.41758	29.31	9	2.33333	11.3333	0.794118	67.72
site54	111.92	41.3841	moderate	low	65.2447	34.7553	-0.0294366	1.1474	28.71	4.66667	4	8.66667	0.538462	98.0733
site55	111.906	41.4167	moderate	low	65.1192	34.8808	-0.0482595	3.86779	27.07	6	2.33333	8.33333	0.72	103.23
site56	111.678	41.4634	moderate	low	63.739	36.261	-0.0349621	2.44575	28.29	8.66667	3	11.6667	0.742857	109.757
site57	111.72	41.4507	moderate	low	69.6361	30.3639	-0.0293561	4.92476	27.555	10	3.33333	13.3333	0.75	136.857
site58	111.865	41.5791	moderate	low	45.0439	54.9561	-0.0390216	1.7832	29.675	4.33333	3	7.33333	0.590909	120.983
site59	111.886	41.4136	moderate	low	56.9636	43.0364	-0.0367226	6.11062	27.735	10	3.33333	13.3333	0.75	153.543
site60	111.699	41.447	moderate	low	62.7353	37.2647	-0.0598236	3.43659	29.74	8	2.33333	10.3333	0.774194	149.76
site61	111.752	41.4248	moderate	low	51.3174	48.6826	-0.0492434	2.44275	28.77	10	5.33333	15.3333	0.652174	99.6567
site62	111.538	41.5011	moderate	low	51.8193	48.1807	-0.0447406	2.71585	29.925	11.3333	3.33333	14.6667	0.772727	138.813
site63	111.63	41.6804	moderate	moderate	37.0138	62.9862	-0.0118826	1.59533	30.205	8.66667	1.33333	10	0.866667	64.15
site64	111.637	41.4139	moderate	moderate	51.192	48.808	-0.00705104	3.54403	28.4	8	4.33333	12.3333	0.648649	112.767
site65	111.642	41.3998	moderate	moderate	51.3174	48.6826	0.00501333	3.5702	27.445	7	3.66667	10.6667	0.65625	119.707
site66	111.597	41.3563	moderate	moderate	48.9335	51.0665	-0.00328529	3.09979	27.73	11	4	15	0.733333	159.083
site67	111.432	41.3686	moderate	moderate	49.1844	50.8156	0.025306	2.24164	28.08	8.33333	6.33333	14.6667	0.568182	150.26
site68	111.375	41.3667	moderate	moderate	40.4015	59.5985	0.0309179	2.74941	28.33	14.6667	2	16.6667	0.88	168.997
site69	111.368	41.2862	moderate	moderate	41.1543	58.8457	-0.00723797	4.19006	25.705	7.66667	2	9.66667	0.793103	123.707
site70	111.801	41.3856	moderate	moderate	41.0289	58.9711	0.00155975	2.86822	28.325	11.3333	3.66667	15	0.755556	134.963
site71	111.723	41.4844	moderate	moderate	65.4956	34.5044	-0.00543922	7.88876	28.39	13.6667	1.33333	15	0.911111	160.497
site72	111.82	41.54	moderate	moderate	36.5119	63.4881	0.0266504	4.61237	28.76	7.33333	1.33333	8.66667	0.846154	71.2867
site73	111.814	41.4117	moderate	moderate	58.0928	41.9072	-0.00572416	9.41542	28.01	5.66667	2.66667	8.33333	0.68	81.2033
site74	111.959	41.4257	moderate	moderate	51.9448	48.0552	0.0216467	4.54038	26.98	8	6	14	0.571429	176.413
site75	111.195	41.4493	moderate	moderate	43.1619	56.8381	-0.0082751	6.90704	29.65	6	3.33333	9.33333	0.642857	153.75
site76	111.66	41.4597	moderate	moderate	66.2484	33.7516	-0.00232079	5.0968	27.655	9.33333	0	9.33333	1	98.45
site77	111.635	41.4552	moderate	moderate	55.3325	44.6675	-0.000388645	5.39915	28.4	13	0	13	1	168.79
site78	111.616	41.4343	moderate	moderate	55.9599	44.0401	0.030602	5.25646	28.27	14.6667	5	19.6667	0.745763	162.47
site79	111.699	41.2911	moderate	high	34.128	65.872	0.0355955	6.37523	25.11	7	4.66667	11.6667	0.6	90.0033
site80	111.721	41.5017	moderate	high	50.6901	49.3099	0.0333787	4.96278	27.97	9.33333	2	11.3333	0.823529	166.067
site81	111.855	41.4641	moderate	high	38.0176	61.9824	0.0551417	2.74348	28.8	7.33333	5	12.3333	0.594595	105.513
site82	111.898	41.4632	moderate	high	38.7704	61.2296	0.041937	1.81106	29.1	12	5	17	0.705882	138.617
site83	111.705	41.6426	moderate	high	37.8921	62.1079	0.0333897	2.42991	30.23	13	2	15	0.866667	135.667
site84	111.702	41.6607	moderate	high	36.3864	63.6136	0.0379488	1.30451	30.05	8	5.66667	13.6667	0.585366	84.0233
site85	111.564	41.6753	moderate	high	33.7516	66.2484	0.0679923	1.60067	28.13	12	6	18	0.666667	110.557
site86	111.467	41.5549	moderate	high	34.128	65.872	0.0472289	2.08711	28.815	11	1.66667	12.6667	0.868421	107.22
site87	111.687	41.4325	moderate	high	36.261	63.739	0.0363788	6.66667	29.57	8	6.33333	14.3333	0.55814	119.237
site88	111.723	41.4112	moderate	high	34.5044	65.4956	0.0367551	6.03802	27.69	4.66667	6.66667	11.3333	0.411765	125.85
site89	111.618	41.6566	moderate	high	34.128	65.872	0.0459191	2.21533	30.055	8	5.33333	13.3333	0.6	106.733
site90	111.69	41.3936	moderate	high	45.4203	54.5797	0.0518145	6.14667	26.89	11	4.66667	15.6667	0.702128	128.173
site91	111.638	41.6581	moderate	high	42.2836	57.7164	0.0342948	1.15402	30.33	8.66667	3.66667	12.3333	0.702703	115.7
site92	111.506	41.618	moderate	high	36.7629	63.2371	0.0430675	0.818926	30.41	9.33333	4.66667	14	0.666667	104.19
site93	111.524	41.6222	moderate	high	40.1506	59.8494	0.0431006	1.3964	28.51	5.66667	4	9.66667	0.586207	92.7567
site94	111.535	41.606	moderate	high	41.5307	58.4693	0.03639	1.10259	29.63	8	2	10	0.8	86.9733
site95	111.783	41.5811	moderate	high	35.6336	64.3664	0.053105	2.23252	29.29	9.66667	1	10.6667	0.90625	124.233
site96	111.642	41.3863	moderate	high	39.1468	60.8532	0.0549458	3.15443	26.94	8.66667	2.66667	11.3333	0.764706	87.7267
site97	111.347	41.2868	moderate	high	47.4279	52.5721	0.0497686	3.68189	26.075	6	0.666667	6.66667	0.9	135.007
site98	111.152	41.3832	high	low	90.5897	9.4103	-0.0809956	11.1798	32.675	11.6667	3	14.6667	0.795455	196.847
site99	111.101	41.3178	high	low	73.2748	26.7252	-0.0463515	3.12335	30.145	8.66667	5.66667	14.3333	0.604651	171.66
site100	111.175	41.3347	high	low	75.7842	24.2158	-0.0723661	3.05407	29.765	12.6667	1	13.6667	0.926829	140.563
site101	111.237	41.313	high	low	89.9624	10.0376	-0.0731399	3.41959	29.105	16	1.66667	17.6667	0.90566	170.307
site102	111.266	41.2959	high	low	90.4642	9.5358	-0.0921437	3.36538	29.73	14.3333	1	15.3333	0.934783	148.987
site103	111.292	41.2991	high	low	74.2785	25.7215	-0.083649	3.96825	29.555	12	3.66667	15.6667	0.765957	120.14
site104	111.214	41.2622	high	low	87.202	12.798	-0.0912674	3.9524	31.065	17	5	22	0.772727	197.86
site105	111.267	41.4229	high	low	93.7265	6.2735	-0.100776	5.61181	28.385	10.3333	1.66667	12	0.861111	117.549
site106	111.238	41.4584	high	low	78.0427	21.9573	-0.0411557	5.67316	30.59	8	3.33333	11.3333	0.705882	140.147
site107	111.187	41.4076	high	low	77.5408	22.4592	-0.0775992	8.91746	33.49	7	2.33333	9.33333	0.75	114.18
site108	111.161	41.408	high	low	89.8369	10.1631	-0.0673673	8.96936	33.375	9	3.66667	12.6667	0.710526	177.363
site109	111.132	41.4026	high	low	97.4906	2.5094	-0.113993	8.00766	33.385	13.6667	2.66667	16.3333	0.836735	192.843
site110	111.093	41.4034	high	low	91.2171	8.7829	-0.0971596	7.21545	34.505	11	1.66667	12.6667	0.868421	146.673
site111	111.742	41.4368	high	moderate	72.6474	27.3526	-0.0169188	3.60547	27.74	9	3.33333	12.3333	0.72973	126.81
site112	111.372	41.4245	high	moderate	75.5332	24.4668	-0.0258402	6.17284	32.615	9.66667	1.66667	11.3333	0.852941	100.743
site113	111.671	41.3972	high	moderate	72.271	27.729	-0.00766971	17.0135	28.175	8.66667	4.66667	13.3333	0.65	113.653
site114	111.314	41.3831	high	moderate	83.187	16.813	-0.0239138	4.74716	32.62	10.6667	1.66667	12.3333	0.864865	150.963
site115	111.146	41.3442	high	moderate	72.6474	27.3526	-0.02762	3.49206	31.88	16.3333	2.66667	19	0.859649	178.247
site116	111.76	41.4888	high	moderate	71.6437	28.3563	5.82855e-05	3.12221	27.45	5	3.66667	8.66667	0.576923	95.6533
site117	111.904	41.4953	high	moderate	73.0238	26.9762	-0.0269645	3.17757	29.435	10.3333	3.66667	14	0.738095	103.653
site118	111.37	41.5407	high	moderate	73.0238	26.9762	-0.00366383	0.911681	29.61	9.33333	6	15.3333	0.608696	175.307
site119	111.726	41.5204	high	moderate	73.9021	26.0979	-0.0153445	5.97484	29.975	10	3.33333	13.3333	0.75	138.89
site120	111.763	41.5285	high	moderate	73.9021	26.0979	-0.0210072	6.41602	28.94	11.3333	3.33333	14.6667	0.772727	150.63
site121	111.775	41.5471	high	moderate	81.054	18.946	-0.0283083	7.04522	29.98	13	1.33333	14.3333	0.906977	183.423
site122	111.785	41.5546	high	moderate	73.7767	26.2233	-0.015942	5.63091	30.45	12	1	13	0.923077	132.7
site123	111.604	41.5027	high	moderate	72.8984	27.1016	-0.0102845	5.03704	28.9	14.3333	1.66667	16	0.895833	161.23
site124	111.629	41.4693	high	moderate	74.1531	25.8469	-0.025698	4.76636	27.52	9	1.66667	10.6667	0.84375	128.05
site125	111.606	41.4692	high	moderate	75.5332	24.4668	-0.0259908	8.02469	29.47	11	1.66667	12.6667	0.868421	129.463
site126	111.591	41.459	high	moderate	71.7691	28.2309	-0.0116885	5.34704	29.825	13.6667	5.33333	19	0.719298	198.9
site127	111.386	41.5269	high	moderate	72.271	27.729	-0.00375348	4.1645	29.975	14	6.66667	20.6667	0.677419	155.733
site128	111.383	41.4966	high	moderate	71.8946	28.1054	-0.0123193	7.743	30.445	11.6667	0.666667	12.3333	0.945946	128.52
site129	111.386	41.4498	high	moderate	72.1455	27.8545	-0.0273632	5.16569	31.32	4	4.33333	8.33333	0.48	106.17
site130	111.802	41.5498	high	moderate	73.5257	26.4743	-0.020169	5.36023	30.495	4.33333	4.66667	9	0.481481	56.85
